# Supplementary material for: Age-related hearing loss accelerates cerebrospinal fluid tau levels and brain atrophy: a longitudinal study
Source: Aging (Albany NY). 2019 May 22;11(10):3156–69. doi: 10.18632/aging.101971 (PMC6555452; doi:10.18632/aging.101971)
Supplement: Supplementary Table 3 [file aging-11-101971-s004.pdf]

## SUPPLEMENTARY MATERIALS

Please browse Full Text version to see the data of Supplementary Tables:

**Supplementary Table 1.** The records of ARHL definition in ADNI database (for CSF biomarker analyses, n = 60)

**Supplementary Table 2.** The records of ARHL definition in ADNI database (for hippocampus analyses, n = 131)

**Supplementary Table 3.** The records of ARHL definition in ADNI database (for other ROIs, n = 74)

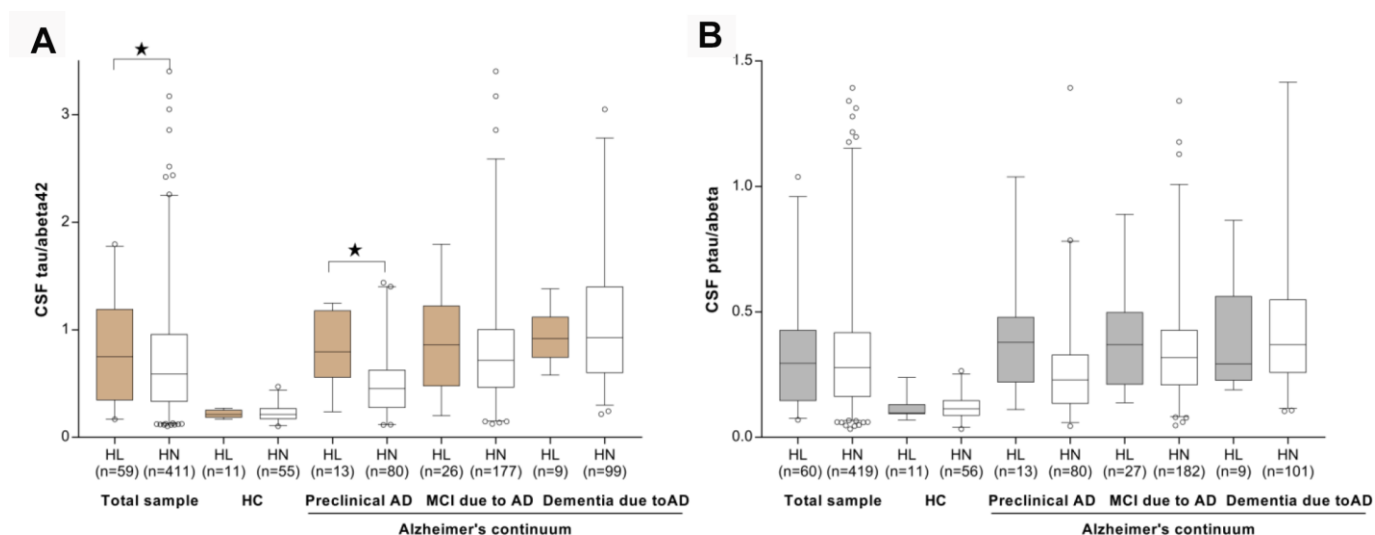

**Supplementary Figure 1.** The cross-sectional association of ARHL with CSF tau/ $A\beta_{42}$  and ptau<sub>181</sub> / $A\beta_{42}$  ratio. ARHL was associated with higher CSF total tau/ $A\beta_{42}$  ratio (A), but not with ptau<sub>181</sub> / $A\beta_{42}$  ratio (B).

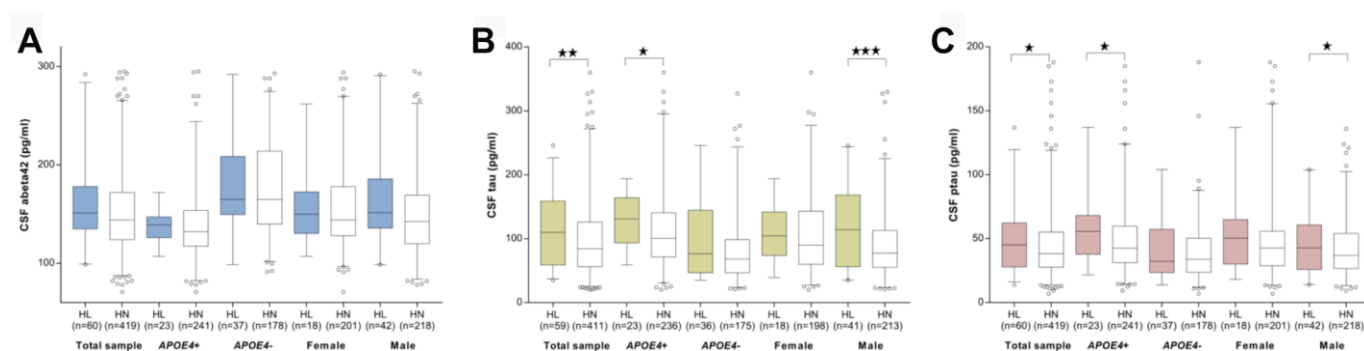

**Supplementary Figure 2.** Subgroup analyses according to gender and *APOE4*. Subgroup analyses showed no association of ARHL with CSF  $A\beta_{42}$  (A) and that ARHL was associated with greater CSF tau (B) or ptau<sub>181</sub> (C) only among *APOE4* carrier ( $\beta = 0.24$ ,  $p = 0.03$  for tau;  $\beta = 0.25$ ,  $p = 0.03$  for ptau<sub>181</sub>) and male ( $\beta = 0.30$ ,  $p = 0.001$  for tau;  $\beta = 0.19$ ,  $p = 0.03$  for ptau<sub>181</sub>) group.

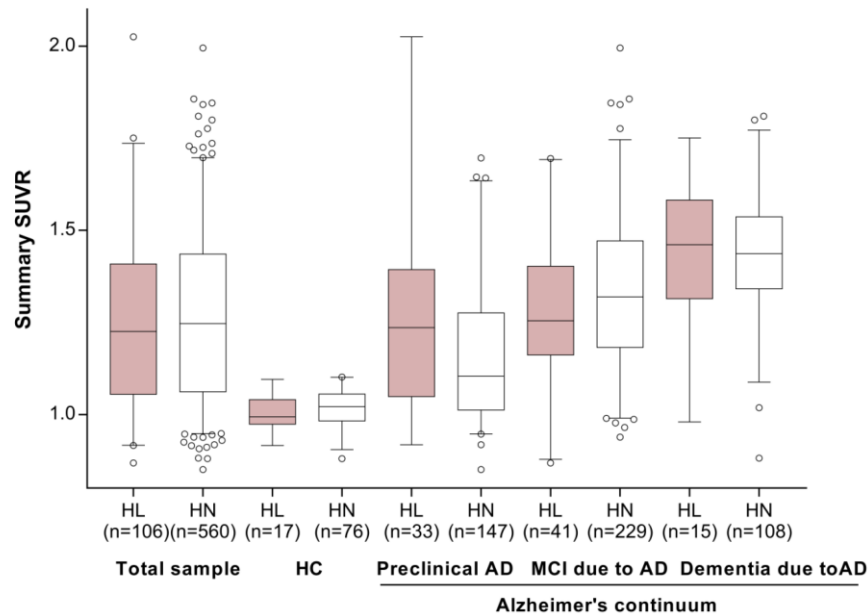

**Supplementary Figure 3. The cross-sectional association of ARHL with brain amyloid deposition.** No significant associations between ARHL and SUVR were found when adjusting for age, gender, education, *APOE4* status, AD continuum group, DM2, hypertension, hyperlipidemia, and BMI.

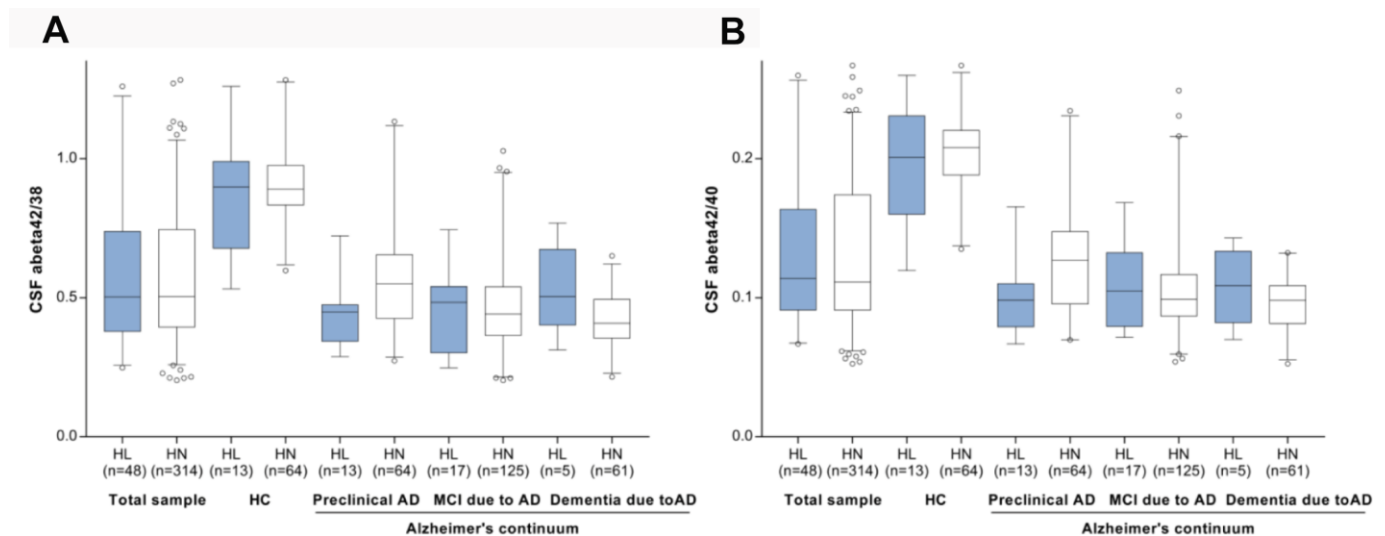

**Supplementary Figure 4. The cross-sectional association of ARHL with CSF  $A\beta_{42}/A\beta_{38}$  and  $A\beta_{42}/A\beta_{40}$  ratio.** No significant association was revealed with either  $A\beta_{42}/A\beta_{38}$  (A) or  $A\beta_{42}/A\beta_{40}$  ratio (B). In ADNI, CSF  $A\beta_{1-42}$ ,  $A\beta_{1-40}$ , and  $A\beta_{1-38}$  were measured by 2D-UPLC-tandem mass spectrometry. The overall performance of quality control is finely acceptable, with the coefficient of variation <15% (6.5-12.8% for  $A\beta_{1-42}$ , 2.2-7.0% for  $A\beta_{1-40}$ , and 5.7-8.0% for  $A\beta_{1-38}$ , respectively). Data was downloaded from ADNI. (HL = 48, HN = 314)
